# Supplementary material
Source: PubMed Central journal article supplement (PMC4183354)

**eTable 1. Concordance of parent and adolescent report of eating disorder symptoms, Kappa (95% CI)**

|                               | <b>Full Population</b>    | <b>Males</b>              | <b>Females</b>            |
|-------------------------------|---------------------------|---------------------------|---------------------------|
| <b>Age 14 Symptoms</b>        |                           |                           |                           |
| <i>Binge eating</i><br>n=4866 | 0.107 (0.062, 0.152)      | 0.074 (0.033, 0.115)      | 0.125 (0.079, 0.172)      |
| <i>Vomiting</i> n=4914        | 0.062 (-0.021,<br>0.145)  | 0.265 (0.122, 0.407)      | -0.001 (-0.012,<br>0.011) |
| <i>Laxatives</i> n=4927       | -0.001 (-0.002,<br>0.000) | -0.001 (-1.000)           | -0.001 (-0.004,<br>0.003) |
| <i>Fasting</i> n=4876         | 0.139 (0.092, 0.186)      | 0.068 (0.028, 0.108)      | 0.148 (0.100, 0.196)      |
| <i>Thinness</i> n=4991        | 0.136 (0.055, 0.218)      | 0.095 (0.023, 0.167)      | 0.185 (0.095, 0.275)      |
| <b>Age 16 Symptoms</b>        |                           |                           |                           |
| <i>Binge eating</i><br>n=3850 | 0.117 (0.074, 0.160)      | 0.096 (0.055, 0.137)      | 0.118 (0.075, 0.161)      |
| <i>Vomiting</i> n=3818        | 0.067 (0.014, 0.121)      | 0.122 (0.055, 0.190)      | 0.060 (0.009, 0.111)      |
| <i>Laxatives</i> n=3802       | 0.125 (0.022, 0.229)      | 0.398 (0.259, 0.538)      | 0.081 (-0.007,<br>0.169)  |
| <i>Fasting</i> n=3558         | 0.055 (0.021, 0.089)      | -0.014 (-0.029,<br>0.001) | 0.061 (0.026, 0.096)      |

**eTable 2. Parent by adolescent report of vomiting at age 16, N**

|                             | <b>Parent = no</b> | <b>Parent = yes</b> | <b>Parent = missing</b> |
|-----------------------------|--------------------|---------------------|-------------------------|
| <b>Adolescent = no</b>      | 3,659              | 6                   | 887                     |
| <b>Adolescent = yes</b>     | 147                | 6                   | 83                      |
| <b>Adolescent = missing</b> | 1,430              | 4                   | 1,746                   |

**eTable 3. Parent by adolescent report of fasting at age 14, N**

|                             | <b>Parent = no</b> | <b>Parent = yes</b> | <b>Parent = missing</b> |
|-----------------------------|--------------------|---------------------|-------------------------|
| <b>Adolescent = no</b>      | 4,426              | 171                 | 758                     |
| <b>Adolescent = yes</b>     | 234                | 45                  | 105                     |
| <b>Adolescent = missing</b> | 1,607              | 93                  | 529                     |

**eTable 4. Absolute fat mass (kg) model estimates, coefficients (SE)\***

|                                          | <b>Binge Eating</b> | <b>Vomiting</b> | <b>Laxative Use</b> | <b>Fasting</b>  | <b>Thinness</b> |
|------------------------------------------|---------------------|-----------------|---------------------|-----------------|-----------------|
| <b>Age 14 Models</b>                     |                     |                 |                     |                 |                 |
| Intercept                                | 14.40<br>(0.30)     | 14.64 (0.30)    | 14.62 (0.30)        | 14.54<br>(0.29) | 14.72 (0.30)    |
| Parity (Multiparous)                     | 0.12 (0.25)         | 0.09 (0.25)     | 0.11 (0.25)         | 0.07 (0.25)     | 0.11 (0.25)     |
| Maternal Education<br>(A level or above) | -1.43 (0.23)        | -1.51 (0.23)    | -1.51 (0.23)        | -1.43 (0.23)    | -1.50 (0.23)    |

|                                          |                 |              |              |                 |              |
|------------------------------------------|-----------------|--------------|--------------|-----------------|--------------|
| Sex (Female)                             | 7.51 (0.28)     | 7.59 (0.27)  | 7.62 (0.27)  | 7.42 (0.28)     | 7.59 (0.27)  |
| Symptom                                  | 4.84 (0.51)     | 3.38 (1.80)  | 3.66 (3.16)  | 3.50 (0.59)     | -5.41 (0.99) |
| Informant (Child)                        | -0.05 (0.15)    | -0.04 (0.16) | -0.02 (0.16) | -0.08 (0.15)    | -0.04 (0.15) |
| Symptom*Informant                        |                 |              |              |                 |              |
| <b>Age 16 Models</b>                     |                 |              |              |                 |              |
| Intercept                                | 14.39<br>(0.30) | 14.66 (0.30) | 14.62 (0.30) | 14.68<br>(0.30) | NA           |
| Parity (Multiparous)                     | 0.09 (0.25)     | 0.09 (0.25)  | 0.10 (0.25)  | 0.09 (0.25)     | NA           |
| Maternal Education<br>(A level or above) | -1.44 (0.22)    | -1.52 (0.23) | -1.50 (0.23) | -1.48 (0.23)    | NA           |
| Sex (Female)                             | 7.43 (0.27)     | 7.57 (0.29)  | 7.56 (0.27)  | 7.43 (0.28)     | NA           |
| Symptom                                  | 5.88 (0.85)     | 1.39 (0.91)  | 9.57 (3.00)  | 2.00 (0.52)     | NA           |
| Informant (Child)                        | 0.21 (0.17)     | -0.06 (0.16) | -0.01 (0.16) | -0.22 (0.16)    | NA           |
| Symptom*Informant                        | -3.11 (0.95)    |              | -7.17 (2.80) |                 | NA           |

\*Models used multiple imputation methods for missingness. Predictors of missingness are summarized in eTable 4.

NA: no thinness measure available at age 16

**eTable 5. Absolute lean mass (kg) model estimates, coefficients (SE)\***

|                                          | <b>Binge Eating</b> | <b>Vomiting</b>  | <b>Laxative Use</b> | <b>Fasting</b>   | <b>Thinness</b>  |
|------------------------------------------|---------------------|------------------|---------------------|------------------|------------------|
| <b>Age 14 Models</b>                     |                     |                  |                     |                  |                  |
| Intercept                                | 55.00<br>(0.20)     | 55.03 (0.20)     | 55.03 (0.20)        | 55.02<br>(0.20)  | 55.08 (0.20)     |
| Parity (Multiparous)                     | -0.11 (0.16)        | -0.11 (0.16)     | -0.11 (0.16)        | -0.11 (0.16)     | -0.11 (0.16)     |
| Maternal Education<br>(A level or above) | 0.36 (0.15)         | 0.35 (0.15)      | 0.35 (0.15)         | 0.36 (0.15)      | 0.36 (0.15)      |
| Sex (Female)                             | -17.15<br>(0.16)    | -17.13<br>(0.16) | -17.14<br>(0.16)    | -17.15<br>(0.16) | -17.15<br>(0.16) |
| Symptom                                  | 0.57 (0.26)         | -0.68 (0.88)     | 0.62 (1.75)         | 0.29 (0.29)      | -2.62 (0.59)     |
| Informant (Child)                        | -0.006<br>(0.08)    | 0.01 (0.09)      | -0.003<br>(0.09)    | -0.006<br>(0.09) | -0.02 (0.09)     |
| Symptom*Informant                        |                     |                  |                     |                  |                  |
| <b>Age 16 Models</b>                     |                     |                  |                     |                  |                  |
| Intercept                                | 54.95<br>(0.19)     | 55.03 (0.20)     | 55.03 (0.20)        | 55.03<br>(0.20)  | NA               |
| Parity (Multiparous)                     | -0.11 (0.16)        | -0.11 (0.16)     | -0.11 (0.16)        | -0.11 (0.16)     | NA               |
| Maternal Education<br>(A level or above) | 0.37 (0.15)         | 0.35 (0.15)      | 0.35 (0.15)         | 0.35 (0.15)      | NA               |
| Sex (Female)                             | -17.17              | -17.14           | -17.15              | -17.15           | NA               |

|                   |              |                   |              |              |    |
|-------------------|--------------|-------------------|--------------|--------------|----|
|                   | (0.16)       | (0.16)            | (0.16)       | (0.16)       |    |
| Symptom           | 1.63 (0.39)  | 0.01 (0.45)       | 0.78 (0.64)  | 0.14 (0.28)  | NA |
| Informant (Child) | 0.05 (0.09)  | -0.0004<br>(0.09) | -0.01 (0.09) | -0.01 (0.09) | NA |
| Symptom*Informant | -1.28 (0.52) |                   |              |              | NA |

\*Models used multiple imputation methods for missingness. Predictors of missingness are summarized in eTable 4.

NA: no thinness measure available at age 16

**eFigure 3. Model-based expected BMI, fat mass, and lean mass at 17.5 years by age-16 symptom report and informant among first-born or only children with lower maternal education levels**

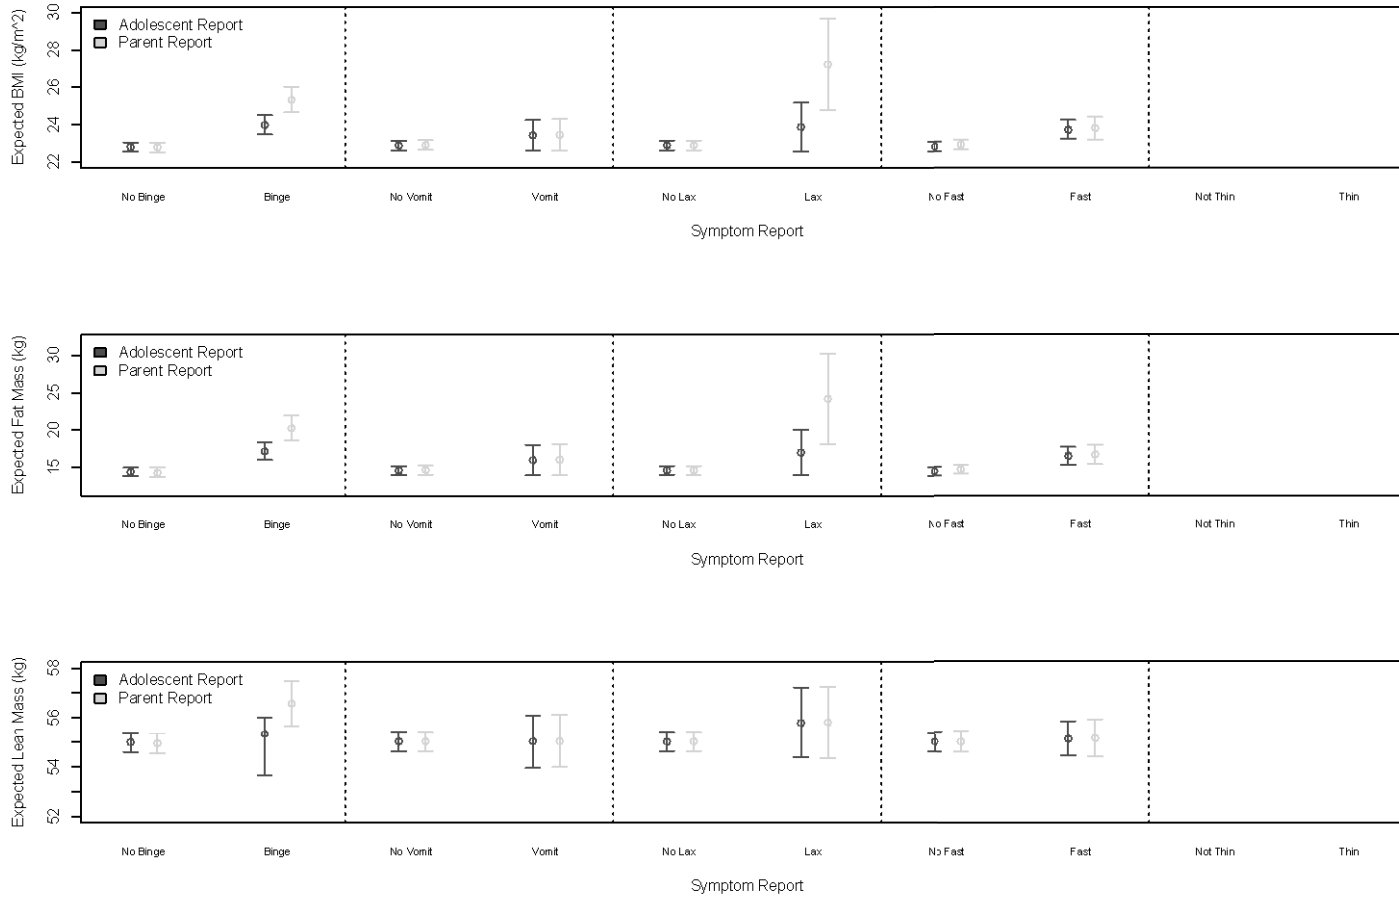

Supplement: NIHMS631322-supplement-01.pdf [file NIHMS631322-supplement-01.pdf]
